# Supplementary material for: Charge transfer doping enabled high-performance deep-ultraviolet photodetectors based on CuI/β-Ga 2 O 3 heterostructures for deep-ultraviolet optical communication
Source: Royal Society of Chemistry journal article supplement (doi:10.1039/d5nr04568a), 2026-01-01
Supplement: d5nr04568a1.pdf [file d5nr04568a1.pdf]

Supporting information for:

**Charge Transfer Doping Enabled High-Performance Deep-Ultraviolet Photodetectors Based on CuI/ $\beta$ -Ga<sub>2</sub>O<sub>3</sub> Heterostructures for Deep-Ultraviolet Optical Communication**

*Liangpan Yang,<sup>1</sup> Xisheng Cui,<sup>1</sup> JiaFeng Xie,<sup>2</sup> Can Fu,<sup>2</sup> Chao Xie,<sup>1\*</sup> Wenhua Yang,<sup>1</sup> and Zhixiang Huang<sup>1\*</sup>*

<sup>1</sup> Industry-Education-Research Institute of Advanced Materials and Technology for Integrated Circuits, State Key Laboratory of Optoelectronic Information Acquisition and Protection Technology, Anhui University, Hefei, Anhui 230601, P. R. China

<sup>2</sup> School of Integrated Circuits, Anhui University, Hefei, Anhui 230601, P. R. China

\* Email: chaoxie@ahu.edu.cn, zxhuang@ahu.edu.cn

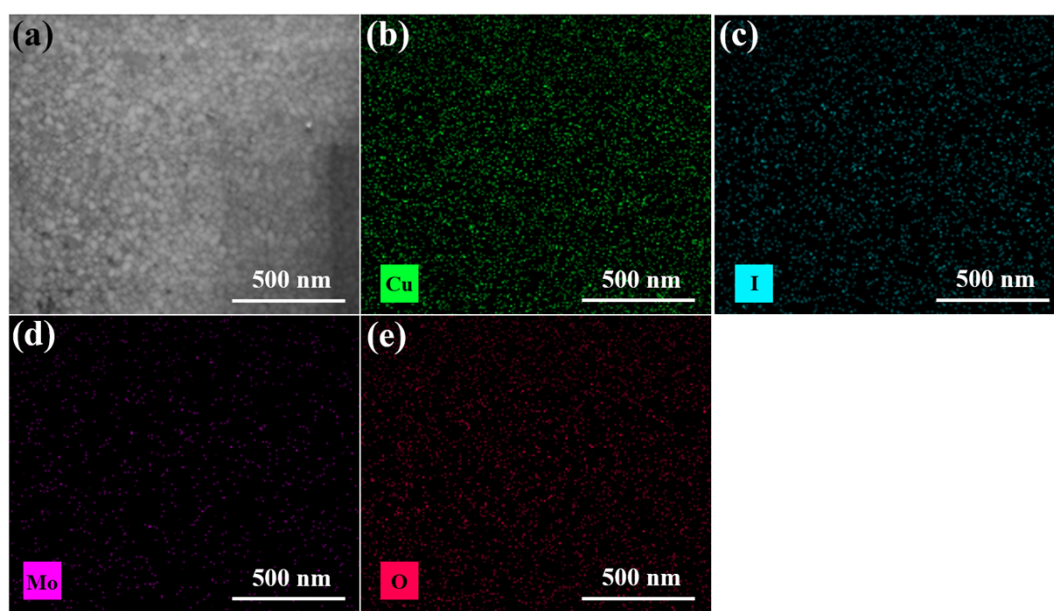

Fig. S1 (a) SEM image and corresponding (b) Cu, (c) I, (d) Mo, and (e) O elemental mapping of a 20 nm-thick CuI thin film doped with 3 nm-thick MoO<sub>3</sub> thin layer.

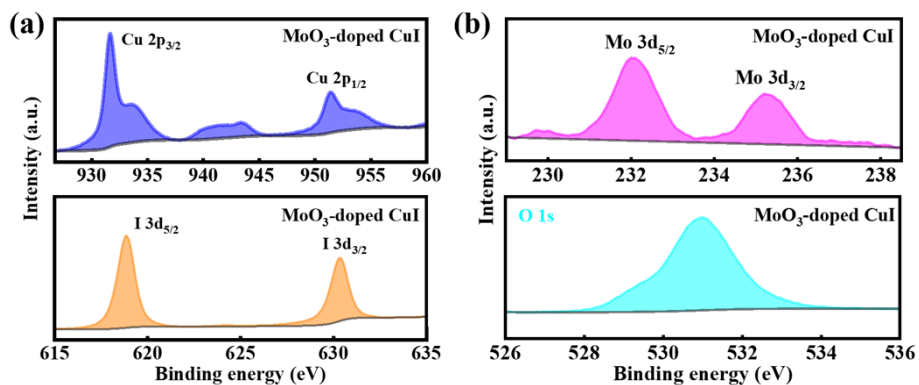

Fig. S2 XPS spectra of a  $\text{MoO}_3$ -doped  $\text{CuI}$  thin film, showing (a)  $\text{Cu}$  2p and  $\text{I}$  3d peaks and (b)  $\text{Mo}$  3d and  $\text{O}$  1s peaks.

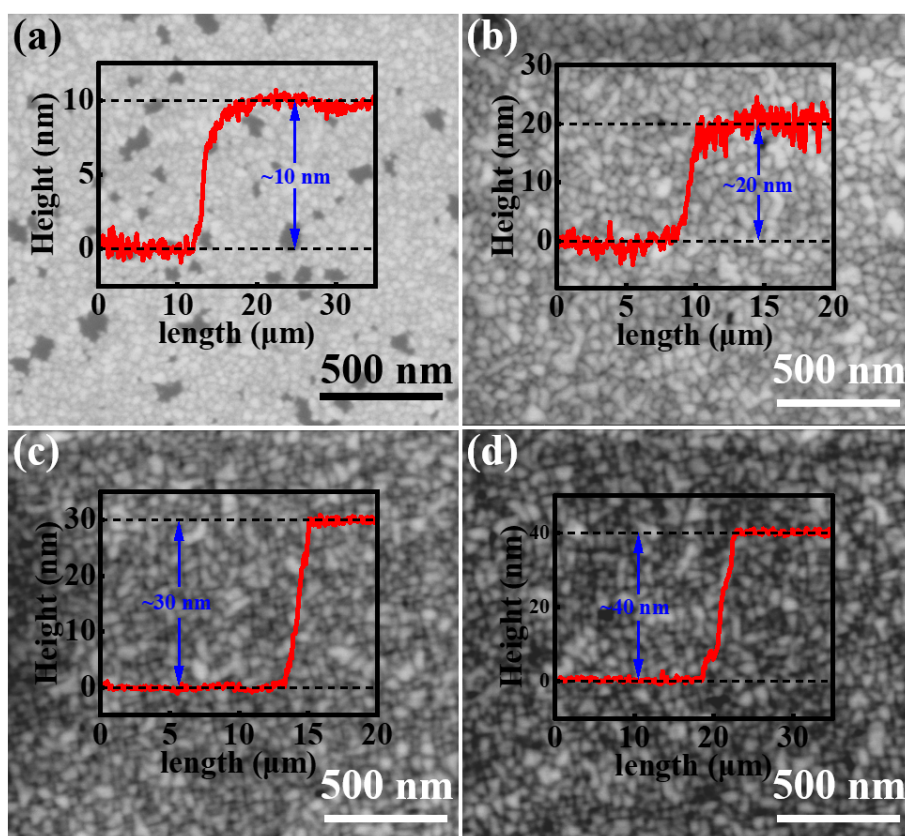

Fig. S3 SEM images of  $\text{CuI}$  thin films with different thicknesses of (a) 10 nm, (b) 20 nm, (c) 30 nm, and (d) 40 nm. The insets display the corresponding height profiles of the thin films.

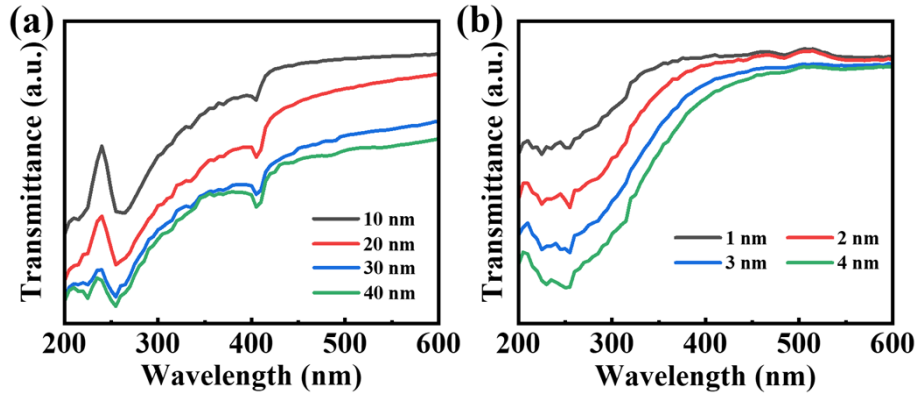

Fig. S4 Optical transmittance spectra of (a) CuI thin films with different thicknesses of 10 nm, 20 nm, 30 nm and 40 nm, and (b) MoO<sub>3</sub> thin layers with diverse thicknesses of 1 nm, 2 nm, 3 nm, and 4 nm.

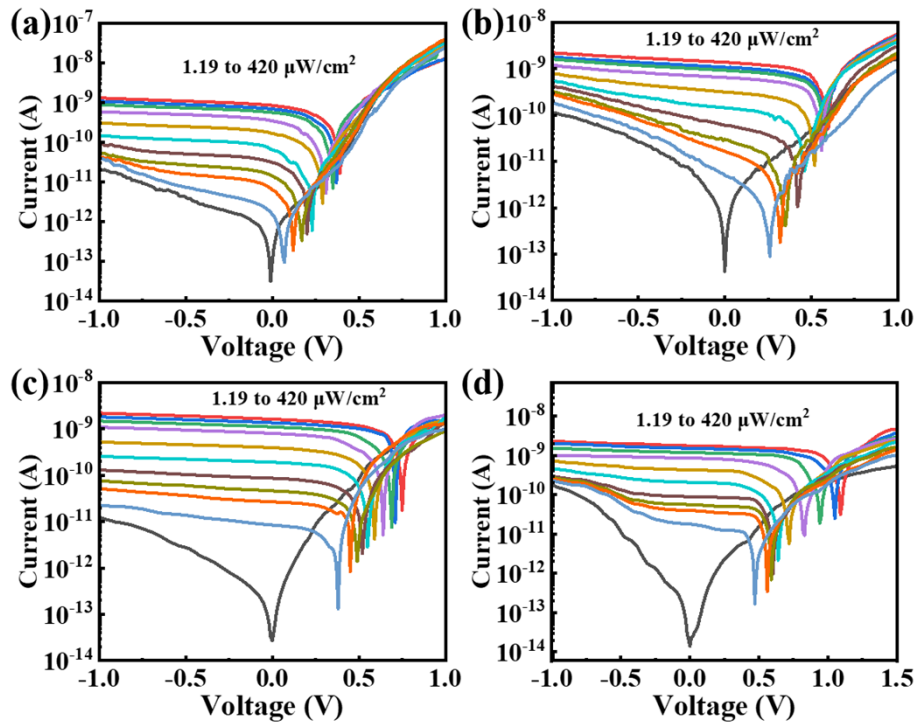

Fig. S5 *I-V* curves of the 20 nm-thick CuI/β-Ga<sub>2</sub>O<sub>3</sub> heterostructure-based DUV light detectors doped with MoO<sub>3</sub> with different MoO<sub>3</sub> thicknesses of (a) 0 nm, (b) 1 nm, (c) 2 nm, and (d) 4 nm, upon 254 nm DUV light irradiations with different light intensities.

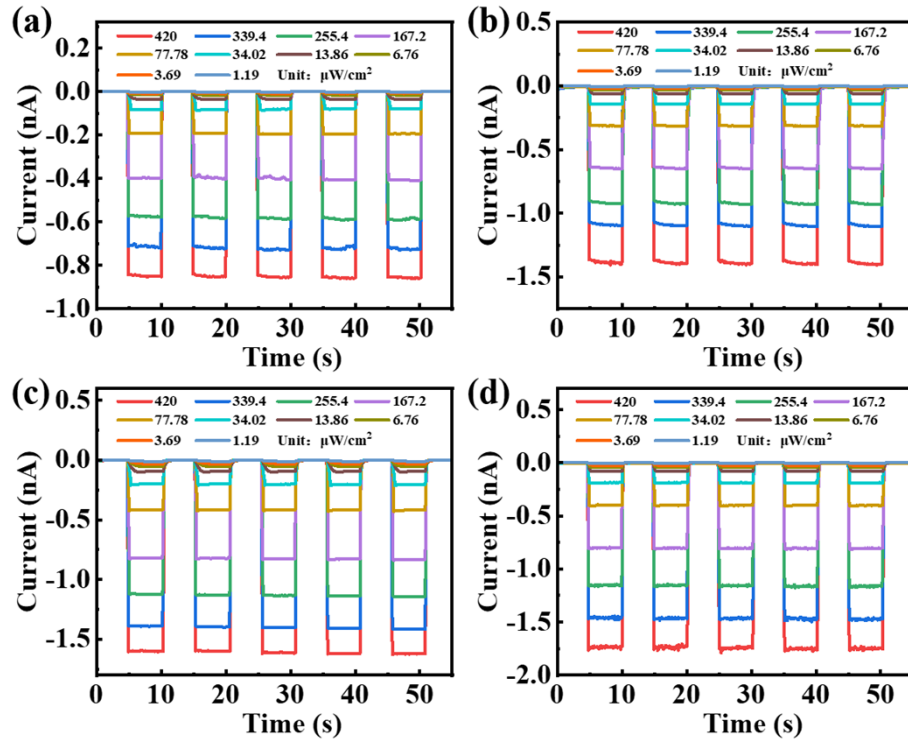

Fig. S6 Time-dependent photoresponse of the 20 nm-thick CuI/ $\beta$ -Ga<sub>2</sub>O<sub>3</sub> heterostructure-based DUV light detectors doped with MoO<sub>3</sub> with different MoO<sub>3</sub> thicknesses of (a) 0 nm, (b) 1 nm, (c) 2 nm, and (d) 4 nm, upon 254 nm DUV light irradiations with different light intensities.

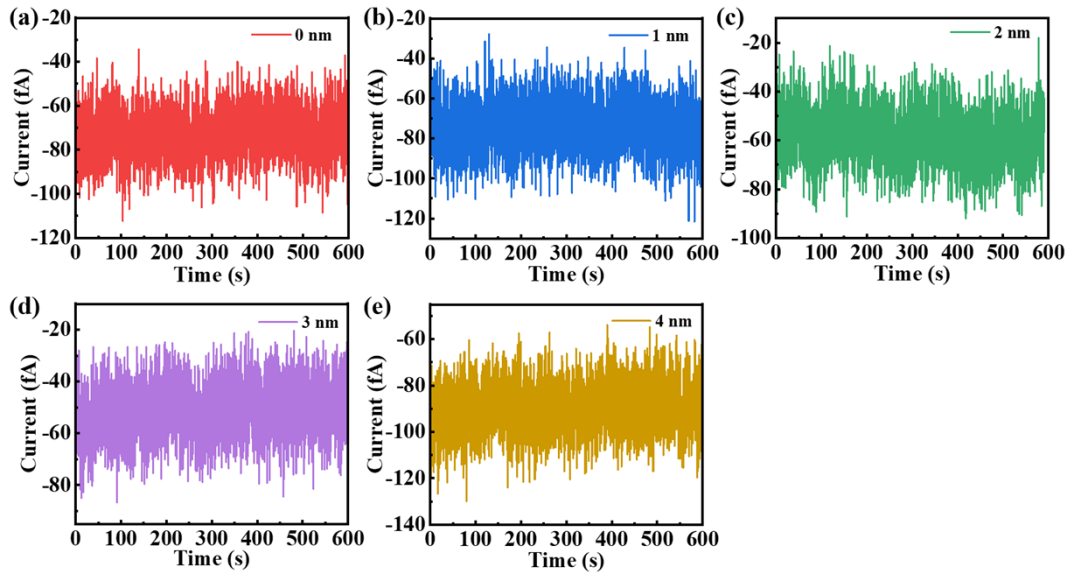

Fig. S7 The curve of dark current at zero bias *versus* time for the 20 nm-thick CuI/ $\beta$ -Ga<sub>2</sub>O<sub>3</sub> heterostructure-based DUV light detectors doped with MoO<sub>3</sub> with different MoO<sub>3</sub> thicknesses of (a) 0 nm, (b) 1 nm, (c) 2 nm, (d) 3 nm, and (e) 4 nm.

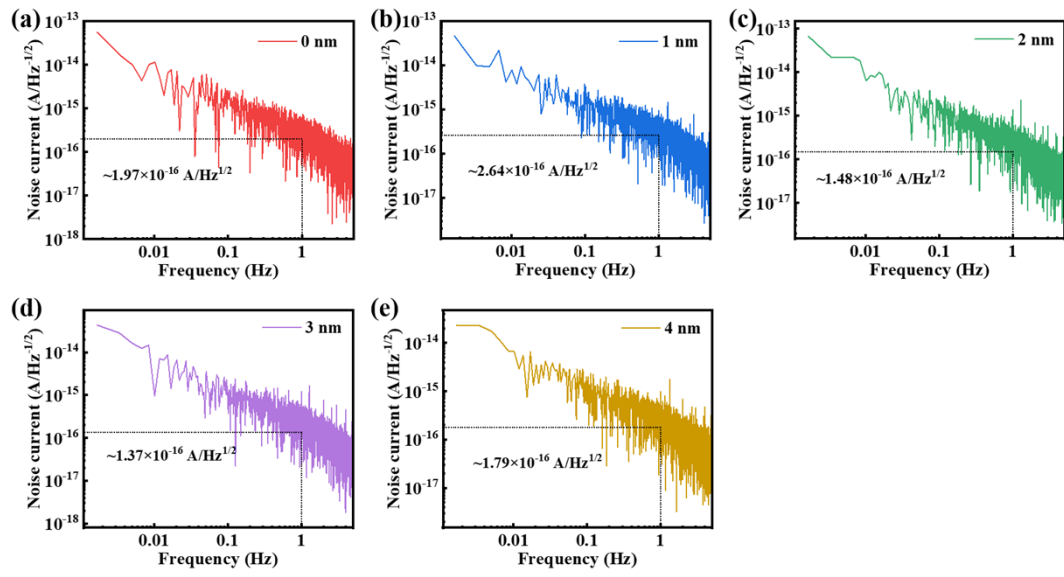

Fig. S8 The noise current as a function of frequency for the 20 nm-thick CuI/ $\beta$ -Ga<sub>2</sub>O<sub>3</sub> heterostructure-based DUV light detectors doped with MoO<sub>3</sub> with different MoO<sub>3</sub> thicknesses of (a) 0 nm, (b) 1 nm, (c) 2 nm, (d) 3 nm, and (e) 4 nm.
